# Supplementary material for: Medication-Wide Association Study Plus (MWAS+): A Proof of Concept Study on Drug Repurposing
Source: MDPI journal article supplement (doi:10.3390/medsci10030048), 2022-08-31
Supplement: s1 [file s1]

**Supplementary Materials: Alzheimer's Disease and Alzheimer's Disease-Related Dementias in Older African American and White Veterans.**

**Table S1.** AD/ADRD Diagnosis Codes

| ICD9/10 Code      | Code Description                                                                                                    |
|-------------------|---------------------------------------------------------------------------------------------------------------------|
| <b>ICD9 Code</b>  |                                                                                                                     |
| 290.0             | Senile dementia, uncomplicated                                                                                      |
| 290.10            | Presenile dementia, uncomplicated                                                                                   |
| 290.4*            | Vascular dementia                                                                                                   |
| 291.2             | Alcohol-induced persisting dementia                                                                                 |
| 292.82            | Drug-induced persisting dementia                                                                                    |
| 294.1*            | Dementia in conditions classified elsewhere                                                                         |
| 294.2*            | Dementia, unspecified                                                                                               |
| 294.8             | Non-specific dementia                                                                                               |
| 331.0             | Alzheimer's disease                                                                                                 |
| 331.19            | Other frontotemporal dementia                                                                                       |
| 331.2             | Senile degeneration of brain                                                                                        |
| 331.7             | Cerebral degeneration in diseases classified elsewhere                                                              |
| 331.82            | Dementia with Lewy bodies                                                                                           |
| 331.89            | Other cerebral degeneration                                                                                         |
| 331.9             | Cerebral degeneration, unspecified                                                                                  |
| <b>ICD10 Code</b> |                                                                                                                     |
| F01.5*            | Vascular dementia                                                                                                   |
| F02*              | Dementia in other diseases classified elsewhere                                                                     |
| F03*              | Unspecified dementia                                                                                                |
| F10.27            | Alcohol dependence with alcohol-induced persisting dementia                                                         |
| F10.97            | Alcohol use, unspecified with alcohol-induced persisting dementia                                                   |
| F13.27            | Sedative, hypnotic or anxiolytic dependence with sedative, hypnotic or anxiolytic-induced persisting dementia       |
| F13.97            | Sedative, hypnotic or anxiolytic use, unspecified with sedative, hypnotic or anxiolytic-induced persisting dementia |
| F18.17            | Inhalant abuse with inhalant-induced dementia                                                                       |
| F18.27            | Inhalant dependence with inhalant-induced dementia                                                                  |
| F18.97            | Inhalant use, unspecified with inhalant-induced persisting dementia                                                 |
| F19.17            | Other psychoactive substance abuse with psychoactive substance-induced persisting dementia                          |
| F19.27            | Other psychoactive substance dependence with psychoactive substance-induced persisting dementia                     |
| F19.97            | Other psychoactive substance use, unspecified with psychoactive substance- induced persisting dementia              |
| G30*              | Alzheimer's disease                                                                                                 |
| G31.09            | Other frontotemporal dementia                                                                                       |
| G31.83            | Dementia with Lewy bodies                                                                                           |

**Table S2.** Excluded Condition Codes

| ICD9/10 Code     | Code Description |
|------------------|------------------|
| <b>ICD9 Code</b> |                  |
| Schizophrenia    |                  |

|                          |                                                                           |
|--------------------------|---------------------------------------------------------------------------|
| 295*                     | Schizophrenic disorders                                                   |
| Bipolar Disorder         |                                                                           |
| 296.0*                   | Bipolar I disorder, single manic episode                                  |
| 296.4*                   | Bipolar I disorder, most recent episode (or current) manic                |
| 296.5*                   | Bipolar I disorder, most recent episode (or current) depressed            |
| 296.6*                   | Bipolar I disorder, most recent episode (or current) mixed                |
| 296.7*                   | Bipolar I disorder, most recent episode (or current) unspecified          |
| 296.8*                   | Other and unspecified bipolar disorders                                   |
| Dementia of Known Causes |                                                                           |
| 046.1*                   | Jakob-Creutzfeldt disease                                                 |
| 046.3                    | Progressive multifocal leukoencephalopathy                                |
| 046.79                   | Other and unspecified prion disease of central nervous system             |
| 046.9                    | Unspecified slow virus infection of central nervous system                |
| 331.11                   | Pick's disease                                                            |
| 333.0                    | Other degenerative diseases of the basal ganglia                          |
| 333.4                    | Huntington's chorea                                                       |
| <b>ICD10 Code</b>        |                                                                           |
| Schizophrenia            |                                                                           |
| F20*                     | Schizophrenia                                                             |
| Bipolar Disorder         |                                                                           |
| F31*                     | Bipolar disorder                                                          |
| Dementia of Known Causes |                                                                           |
| A81.00                   | Creutzfeldt-Jakob disease, unspecified                                    |
| A81.01                   | Variant Creutzfeldt-Jakob disease                                         |
| A81.09                   | Other Creutzfeldt-Jakob disease                                           |
| A81.2                    | Progressive multifocal leukoencephalopathy                                |
| A81.89                   | Other atypical virus infections of central nervous system                 |
| F10.96                   | Alcohol use, unspecified with alcohol-induced persisting amnesic disorder |
| G23.1                    | Progressive supranuclear ophthalmoplegia [Steele-Richardson-Olszewski]    |
| G31.01                   | Pick's disease                                                            |
| G90.3                    | Multi-system degeneration of the autonomic nervous system                 |
